# Supplementary material for: Tandem Repeat DNA Provides Many Cytological Markers for Hybrid Zone Analysis in Two Subspecies of the Grasshopper Chorthippus parallelus
Source: MDPI journal article supplement (doi:10.3390/genes14020397), 2023-02-03
Supplement: s1 [file s1]

**Table S1.** Primers designed to amplify 82 TR families.

| TR family    | Forward                     | Reverse                    | PCR amplification |
|--------------|-----------------------------|----------------------------|-------------------|
| CpaTR001-148 | TGGTTGGAATTA AAAAGATACGTGT  | GAATCCAAATACCAATTTTGTAGTTC | Yes               |
| CpaTR002-188 | CGAGGGAGGACTCGAACCTC        | GGGCATGGGTGTTTGTGTTG       | No                |
| CpaTR003-133 | ACATCGAGAACCTGTCAACCA       | TGTACCCCTGTCCGCTCAGT       | Yes               |
| CpaTR004-335 | TTGTGACGTTTGATTTTATATAGGTA  | GTGAACTCTGAAACTACCCAAC     | Yes               |
| CpaTR005-130 | AGTCCGTAGGTAAAGTACCCTC      | CTTGACGAAATTTTGCACACTTGAC  | Yes               |
| CpaTR006-11  | TCGCGCAGACTTCGCGCA          | GCGCGAAGTCTGCGCGAA         | Yes               |
| CpaTR007-21  | CTGGGTGCAGGCCTAGGTTA        | CTAGGCCTGCACCCAGGTAA       | Yes               |
| CpaTR008-331 | GTTACTGAAAACATTTAAAATTGCGA  | ACTGTCGTTTCATCTATTTGAAACC  | Yes               |
| CpaTR009-172 | TGCCCCAAACAATGCTCAAGA       | AGGCATGATTTTCATCAAAATCGGAC | Yes               |
| CpaTR010-275 | TACTGCACGACTGACAGTGG        | AGGGCAATGGTCTCTGCTG        | Yes               |
| CpaTR011-213 | TGTGAAGAAATTGTTACTTCTGTATCA | CTTGCTGCAGATACACTCCTGGG    | Yes               |
| CpaTR012-247 | CCACCGTGACACAGTACGTAC       | TGGAGGCATAGGTGCCACTG       | Yes               |
| CpaTR013-55  | GCTATCGAACATATAAAAACGCGAC   | TTGGTTAGGTATAGGTTACCTTAGG  | Yes               |
| CpaTR014-299 | CTCTCACAGGACGCAAGTGCC       | GAGACTGCATTACCCACACAATCTT  | Yes               |
| CpaTR015-284 | CAATCCGAACCCCAGGAACC        | TGCCCTAATGACGCTGCAAA       | Yes               |
| CpaTR016-7   | TGAGATATGAGATATGAGATATGAG   | CATATCTCATATCTCATATCTCATA  | Yes               |
| CpaTR017-289 | CCGACTGGGGACAAGTGGTA        | GGAAACCGAACCAAGGACCC       | Yes               |
| CpaTR018-166 | TGAACAACGACAGACCCACATTTA    | CACTTCAATCTCCAAAACACTTC    | Yes               |
| CpaTR020-246 | TTGGGCGCCAGCTTTAGAAG        | AACGTAAATAAACAATAAGCCTGG   | Yes               |
| CpaTR021-89  | CCGTCTAGTGCAGCGTCAC         | TCGTCTCAGCTGCTTGATGC       | Yes               |
| CpaTR022-239 | GGCACCACGTCTGCAGTAAA        | GACCTACCAAGGCCTCGTTG       | Yes               |
| CpaTR023-176 | CCTTGCCCTCCAACCTCAGG        | TGTCCAGTATTCAGTTGTCCA      | Yes               |
| CpaTR024-210 | AGAGAGGGAAGGGTGAGCTAT       | CAGAGCTCCAGACTGTCAGCAG     | Yes               |
| CpaTR025-248 | TGTGCTGTGTTCAAAAGTCAAAG     | GCTTGTAGCCAGTGTAGTGTGC     | Yes               |
| CpaTR026-239 | GGGAAATGTGTTAGCCCTTCCAGT    | AGAGCACACTGAGTGCATACGT     | Yes               |
| CpaTR028-148 | GGTGGAGTTTGAAGAGTTATGCG     | GGAAATACCAATCCCTGCAACTG    | Yes               |
| CpaTR029-290 | TCACCCATTAAACGTGTTCTGA      | ACAAAGAACTACAAACGAAAATTCGT | Yes               |
| CpaTR030-79  | ACTACCAGTCCTGTGTGAC         | CAATGGCTGTGGTAGCAGCA       | Yes               |
| CpaTR031-236 | TCAGTTGGTCGCCAGCCTTT        | TGATAACGTAAATAAACAAACGG    | Yes               |
| CpaTR032-20  | AACCCAATGTACCTTAACCTAACC    | GTTAGGTTAAGGTACATTGGGTTA   | Yes               |
| CpaTR033-222 | GCTGTAGGCTGACAAGTACACAC     | AGCAGCAGTGCAGTAGAAGG       | Yes               |
| CpaTR034-61  | GCAATCACTCTTGCACTCA         | TGCTTGTGGGAGTGAGTGTTT      | Yes               |
| CpaTR035-165 | TTTCCACACCACAGTCCCCT        | ACTGTTGTTGTCTGCTGTGGT      | Yes               |
| CpaTR036-168 | ATGGAAACGACTTATTGTCAATTC    | TGGAAATGCACAAAACACGA       | Yes               |
| CpaTR037-147 | GCGAATATGACGAGAATATTGTATATG | GCGAAAACAGCTTAAACAGGGT     | Yes               |
| CpaTR038-203 | ACGGCTCCGACGCATCAAGC        | AGGGGAGGCCGAGGTGTGTG       | Yes               |
| CpaTR039-139 | GGGCTGGTCCCCCTACACCT        | GCGGAGTAGGCTACCTGACTGGAG   | Yes               |
| CpaTR040-161 | ACAGCAAAGTCCCACACAAT        | TAACGGTCTTGCTTGGGCAA       | Yes               |
| CpaTR042-151 | GCACCGTCTGATCCAAGTGT        | ACACACGCTTGACTCACCCAC      | Yes               |
| CpaTR043-237 | ATATAACGATAAATAAACAACCTTTCA | TATGTGTTTTGTGATTTAGTTTGCT  | Yes               |
| CpaTR044-205 | GTCTTCCCATGGTGTGAGTTGT      | ACTGGAAATTCGAAAAGGGATGCT   | Yes               |
| CpaTR046-157 | AAGAAAGAGCAAGTTACGAGAAT     | ACTTCCATGCTGTTACACTAACG    | Yes               |
| CpaTR047-287 | ACCTGGCTTGGCGTTGAAAT        | TTCGTCGCAGCTCTTCAACA       | Yes               |
| CpaTR048-15  | TGCCCTGAAAGTGGGTGCCC        | GGCACCCACTTTTCAGGGCAC      | Yes               |
| CpaTR049-215 | CGGCGCTCCTAATCACGAGCC       | GCTGTCGCTCTTGCTGCGCT       | Yes               |
| CpaTR050-288 | GGAACCCACACCATGAACCA        | TGTGTGAGACCACAGTTTCA       | Yes               |
| CpaTR051-53  | CCAGTGACATGAAATTTGTTTATAAGC | GGTAAATGTTATAAACGAGAACTGT  | Yes               |
| CpaTR052-43  | CAGTAATCTGTAGAAATATCAGGGTAC | GTATATTGCCACTATTTGTACCCTG  | No                |
| CpaTR053-405 | ACTGATAAATCAAGATACGTGACACAA | TGAGTGTTTGCCTGCATATT       | Yes               |
| CpaTR057-102 | TACTGGGAGCTGGGCACGGG        | ACCAGCACCCCTCCCACTGT       | Yes               |

|              |                             |                             |     |
|--------------|-----------------------------|-----------------------------|-----|
| CpaTR058-196 | CCTGTGACGCCTCCCCCTC         | GCTCAACAAAAGAAAAGCAACATTCTG | Yes |
| CpaTR060-14  | TGGAGGTAGCAATTTGGAGG        | TGGAGGTAGCAATTTGGAGG        | No  |
| CpaTR061-27  | ACAGAGACAGGGGAGAGGAGGA      | CTCCCCTGTCTCTGTTCCTTC       | Yes |
| CpaTR062-56  | GCAGGGATGAGTTGTGCCTGAGT     | TGCCATGGGCTTCGTCACTCA       | Yes |
| CpaTR063-92  | CTGATGTGGCGACGGGCTGG        | CCACGCCTCCTTCACGTGCC        | Yes |
| CpaTR065-379 | TGGCCGGTTATCAGGGCCGA        | CCACTTGCCCAGCACTTGCCA       | Yes |
| CpaTR068-155 | AGAGAGGAGAAGGCCAGCTG        | TCAACGTGGGAGGCGTCTAT        | Yes |
| CpaTR069-89  | TGTCCCACAAATTGGCTGTGA       | TCCTGTTGGAACTCCTCTCCA       | Yes |
| CpaTR070-84  | TGTGGGGCCTTGTTCCAGTGTGTAT   | TGGCAAATCTTTTACTGAGTTGGGTAC | Yes |
| CpaTR071-164 | CGGTTACACGCGAATTTTCA        | CGACACCATGTTGGTAATGGT       | Yes |
| CpaTR072-144 | TCCCTTTACACAAAAATTCCCCCA    | ACTTTATGAAAAATCGAAAGCAAAGGA | Yes |
| CpaTR073-67  | CCAAAGGGCAGAGTCAGTCC        | TGGTCAGCCTAGCTGTGTTG        | Yes |
| CpaTR074-186 | TAGCATGTGATGGTGTGGGG        | TCAGTATTGGCTTTTCCTCAGT      | Yes |
| CpaTR075-45  | GCTAGTAAAGGGCCATGCTGCA      | GCTGTGTGACATGCTCTCGTCA      | Yes |
| CpaTR076-168 | AAAGCATGGTCACGTCCGAC        | ACACATTTCCCCACACAGCTAAAA    | Yes |
| CpaTR077-16  | TGCGAGTGCACACCTGTGCG        | ACAGGTGTGCACTCGCACAG        | Yes |
| CpaTR081-170 | AAGAAACAACGATTAATTTCAGAATTA | ACGGTTGCAACTGGTCATATTGAG    | Yes |
| CpaTR085-37  | AGATAAGTGGGATCACATTCCCC     | AAAACCTGGAAGGGGGAATG        | No  |
| CpaTR087-247 | AACGTCTTTGGAAGCACTATAGT     | AGCAAACAAAACTACTTCTGTACAAC  | Yes |
| CpaTR091-49  | CCCTCCTATTGCAGTCTCAT        | GGGAGATGTGATGACACAGACTGA    | Yes |
| CpaTR094-170 | ACAAAGAAACACTGATTAAATTGAAGT | CGGTCATAACTGGTCTGGTTGAA     | Yes |
| CpaTR097-108 | AGGGTAAATCCAGTAATGCTCCA     | AACCTACGTAAACAACATGAAAATT   | Yes |
| CpaTR098-169 | TGAGCTACCGTCCTTGCACT        | AGAGAGTAACTGGAGTCAGGACG     | No  |
| CpaTR100-295 | GGGATGCAGGTGGTCAGGACG       | CCCCACCCCAGTATATGAT         | Yes |
| CpaTR101-112 | AGTCCTAGCTCCACCACACGT       | ACATCCCATACGTACACTGCA       | Yes |
| CpaTR102-127 | GGTAGATAGCCATAGAGGCGATGG    | ACCTGCATAGTGTTTTGCCCTTCA    | Yes |
| CpaTR103-33  | TCCCCACGTCTCTAGTGCCA        | GTGGGGACAGATGATGAGATG       | Yes |
| CpaTR104-269 | ACGCTTCCAAACGAACTCAAAGACA   | TAGCTGCCAAGGCTTGACGGT       | Yes |
| CpaTR107-237 | TGGGGAGGCAGGTGGTCAGG        | TCCTGTACGTAAATTTACACTCCTG   | Yes |
| CpaTR108-37  | GCCTCCCTACCTGTGACCATGAC     | GGCTACAACTGTACAATGTCATGGT   | Yes |
| CpaTR109-108 | GGCACGGTAGATTCCGACAAGA      | GCCGCAGGACGATCAGGAGA        | Yes |
| CpaTR110-159 | TCACAATCACGTCCAGGGGGTG      | ACCCCTATCACTTACACTGC        | Yes |

**Table S2.** Sequence characteristics of the 110 TR families found in the genome of *C. parallelus*. RUL= Repeat Unit Length, A+T= adenin+thymine content, SF= superfamily, Subfam= number of subfamilies, CPPabun and CPE abun= genomic abundance per subspecies. CPP= *Chorthippus parallelus parallelus*, CPE= *Chorthippus parallelus erythropus*. FISH patterns: B= banded, DB= dotted-banded, D= dotted, NS= no signal.

| TR_name        | RUL | A+T (%) | SF | Subfam | Genomic abundance (%) |         | FISH pattern |     | TE homology                               |
|----------------|-----|---------|----|--------|-----------------------|---------|--------------|-----|-------------------------------------------|
|                |     |         |    |        | CPPabun               | CPEabun | CPP          | CPE |                                           |
| CpaTR001-148   | 148 | 66.89   | 1  | 3      | 0.91623               | 1.00776 | NS           | NS  | Helitron-N10_LMi                          |
| CpaTR002-188   | 188 | 49.47   |    | 1      | 0.52640               | 0.45403 |              |     | hAT-11_LMi, DNA8-16_LMi                   |
| CpaTR003-133   | 133 | 63.91   |    | 1      | 0.28719               | 0.27922 | NS           | NS  | DNA8-5_LMi, Mariner-N21_LMi, DNA8-11B_LMi |
| CpaTR004-335   | 335 | 61.19   |    | 2      | 0.27214               | 0.23718 | B            | B   | Helitron-N19B_LMi, DNA-7_LMi              |
| CpaTR005-130   | 130 | 62.31   |    | 2      | 0.24854               | 0.24244 | NS           | NS  | DNA8-16B_LMi, hAT-N12_LMi                 |
| CpaTR006-11    | 11  | 36.36   |    | 2      | 0.21965               | 0.14931 | B            | B   |                                           |
| CpaTR007-21    | 21  | 38.10   |    | 1      | 0.09553               | 0.10323 | B            | B   |                                           |
| CpaTR008-331   | 331 | 64.05   | 2  | 1      | 0.09247               | 0.09413 | B            | B   | Helitron-N11B_LMi                         |
| CpaTR009-172   | 172 | 63.95   | 2  | 2      | 0.07876               | 0.08039 | B            | B   | Helitron-N11B_LMi                         |
| CpaTR010-275   | 275 | 52.00   |    | 2      | 0.07597               | 0.08906 | DB           | DB  |                                           |
| CpaTR011-213   | 213 | 58.69   |    | 2      | 0.06702               | 0.06434 | B            | B   |                                           |
| CpaTR012-247   | 247 | 53.85   |    | 1      | 0.05453               | 0.06219 | B            | B   | hAT-30N1_LMi                              |
| CpaTR013-55    | 55  | 60.00   |    | 3      | 0.05330               | 0.05227 | B            | NS  |                                           |
| CpaTR014-299   | 299 | 64.21   |    | 2      | 0.03948               | 0.07974 | D            | D   | DNA8-9_LMi                                |
| CpaTR015-284   | 284 | 65.14   |    | 1      | 0.03656               | 0.04484 | NS           | NS  |                                           |
| CpaTR016-7     | 7   | 71.43   |    | 1      | 0.03373               | 0.00464 | B            | B   |                                           |
| CpaTR017-289   | 289 | 51.90   |    | 2      | 0.03343               | 0.03444 | B            | B   |                                           |
| CpaTR018-166   | 166 | 62.65   | 2  | 1      | 0.02823               | 0.02842 | NS           | NS  | Helitron-N11B_LMi                         |
| CpaTR019-5-tel | 5   | 60.00   |    | 1      | 0.02449               | 0.02959 | B            | B   |                                           |
| CpaTR020-246   | 246 | 59.35   | 4  | 2      | 0.02242               | 0.02403 | B            | B   | CR1-1_LMi                                 |
| CpaTR021-89    | 89  | 41.57   |    | 2      | 0.02069               | 0.01463 | D            | NS  |                                           |
| CpaTR022-239   | 239 | 50.21   |    | 1      | 0.02035               | 0.01544 | NS           | NS  |                                           |
| CpaTR023-176   | 176 | 57.95   |    | 1      | 0.02004               | 0.03260 | D            | D   |                                           |
| CpaTR024-210   | 210 | 61.43   | 3  | 1      | 0.01966               | 0.02190 | B            | B   |                                           |
| CpaTR025-248   | 248 | 62.90   | 5  | 2      | 0.01960               | 0.02061 | B            | NS  |                                           |
| CpaTR026-239   | 239 | 59.83   | 3  | 1      | 0.01916               | 0.04248 | B            | B   |                                           |
| CpaTR027-82    | 82  | 47.56   |    | 1      | 0.01660               | 0.00811 |              |     |                                           |
| CpaTR028-148   | 148 | 59.46   | 1  | 2      | 0.01586               | 0.01787 | B            | B   | Helitron-N10_LMi                          |
| CpaTR029-290   | 290 | 65.52   |    | 1      | 0.01523               | 0.01715 | NS           | D   |                                           |
| CpaTR030-79    | 79  | 45.57   |    | 3      | 0.01368               | 0.01075 | B            | B   |                                           |
| CpaTR031-236   | 236 | 59.75   | 4  | 2      | 0.01193               | 0.00776 | D            | D   | CR1-1_LMi                                 |
| CpaTR032-20    | 20  | 65.00   |    | 2      | 0.01080               | 0.02159 | B            | B   |                                           |
| CpaTR033-222   | 222 | 63.06   | 5  | 2      | 0.01029               | 0.01255 | NS           | B   |                                           |
| CpaTR034-61    | 61  | 57.38   |    | 1      | 0.00963               | 0.01749 | NS           | B   |                                           |
| CpaTR035-165   | 165 | 57.58   |    | 1      | 0.00941               | 0.01044 | NS           | NS  |                                           |
| CpaTR036-168   | 168 | 58.93   |    | 3      | 0.00923               | 0.00433 | B            | B   | PST1 (Satellite)                          |
| CpaTR037-147   | 147 | 63.95   |    | 2      | 0.00912               | 0.00911 | NS           | NS  |                                           |
| CpaTR038-203   | 203 | 35.96   |    | 1      | 0.00876               | 0.00853 | D            | D   |                                           |
| CpaTR039-139   | 139 | 46.04   |    | 2      | 0.00817               | 0.00803 | B            | B   |                                           |
| CpaTR040-161   | 161 | 58.39   | 6  | 3      | 0.00798               | 0.00494 | B            | B   |                                           |
| CpaTR041-388   | 388 | 54.64   |    | 1      | 0.00772               | 0.00606 |              |     |                                           |
| CpaTR042-151   | 151 | 50.99   |    | 1      | 0.00771               | 0.00713 | NS           | NS  | Mariner-73_LMi                            |
| CpaTR043-237   | 237 | 61.18   | 5  | 3      | 0.00735               | 0.00552 | NS           | D   |                                           |
| CpaTR044-205   | 205 | 59.02   |    | 1      | 0.00734               | 0.00893 | B            | B   |                                           |
| CpaTR045-220   | 220 | 62.73   | 10 | 1      | 0.00731               | 0.01056 |              |     | CR1-4_LMi                                 |
| CpaTR046-157   | 157 | 68.15   | 7  | 2      | 0.00730               | 0.01031 | B            | B   |                                           |

|              |     |       |    |   |         |         |    |    |                |
|--------------|-----|-------|----|---|---------|---------|----|----|----------------|
| CpaTR047-287 | 287 | 62.37 |    | 1 | 0.00655 | 0.01115 | NS | B  |                |
| CpaTR048-15  | 15  | 40.00 |    | 1 | 0.00639 | 0.00453 | B  | B  |                |
| CpaTR049-215 | 215 | 59.53 |    | 1 | 0.00625 | 0.00196 | B  | B  |                |
| CpaTR050-288 | 288 | 67.01 |    | 1 | 0.00584 | 0.00830 | NS | B  | RTE-53_LMi     |
| CpaTR051-53  | 53  | 69.81 |    | 1 | 0.00566 | 0.01019 | NS | NS |                |
| CpaTR052-43  | 43  | 67.44 |    | 1 | 0.00549 | 0.00361 |    |    |                |
| CpaTR053-405 | 405 | 60.74 | 9  | 1 | 0.00536 | 0.00835 | B  | NS | CR1-2_LMi      |
| CpaTR054-180 | 180 | 59.44 |    | 1 | 0.00533 | 0.00256 |    |    |                |
| CpaTR055-286 | 286 | 50.70 | 11 | 1 | 0.00519 | 0.00474 |    |    |                |
| CpaTR056-206 | 206 | 62.62 |    | 1 | 0.00509 | 0.00451 |    |    | P-2N1_LMi      |
| CpaTR057-102 | 102 | 39.22 |    | 1 | 0.00493 | 0.00246 | NS | B  |                |
| CpaTR058-196 | 196 | 60.20 |    | 2 | 0.00481 | 0.00475 | B  | NS |                |
| CpaTR059-54  | 54  | 53.70 |    | 1 | 0.00477 | 0.00743 |    |    |                |
| CpaTR060-14  | 14  | 57.14 |    | 1 | 0.00469 | 0.00202 |    |    |                |
| CpaTR061-27  | 27  | 44.44 |    | 1 | 0.00449 | 0.00507 | B  | B  |                |
| CpaTR062-56  | 56  | 46.43 |    | 1 | 0.00443 | 0.00442 | B  | B  | hAT-N34_LMi    |
| CpaTR063-92  | 92  | 39.13 |    | 1 | 0.00441 | 0.00235 | B  | B  |                |
| CpaTR064-51  | 51  | 41.18 |    | 1 | 0.00441 | 0.00216 |    |    |                |
| CpaTR065-379 | 379 | 63.32 |    | 1 | 0.00422 | 0.00264 | B  | B  | Penelope-6_LMi |
| CpaTR066-247 | 247 | 59.51 | 4  | 2 | 0.00419 | 0.00339 |    |    |                |
| CpaTR067-177 | 177 | 60.45 |    | 2 | 0.00408 | 0.00465 |    |    |                |
| CpaTR068-155 | 155 | 61.29 |    | 1 | 0.00402 | 0.00225 | B  | B  |                |
| CpaTR069-89  | 89  | 63.27 |    | 1 | 0.00398 | 0.00133 | B  | B  |                |
| CpaTR070-84  | 84  | 58.33 | 8  | 1 | 0.00392 | 0.00385 | NS | NS |                |
| CpaTR071-164 | 164 | 68.29 |    | 1 | 0.00369 | 0.00694 | NS | NS |                |
| CpaTR072-144 | 144 | 76.39 |    | 1 | 0.00361 | 0.00508 | NS | NS |                |
| CpaTR073-67  | 67  | 52.24 |    | 1 | 0.00359 | 0.00378 | NS | NS |                |
| CpaTR074-186 | 186 | 57.53 |    | 1 | 0.00351 | 0.00795 | B  | B  |                |
| CpaTR075-45  | 45  | 48.89 |    | 1 | 0.00342 | 0.00226 | B  | B  |                |
| CpaTR076-168 | 168 | 63.10 |    | 2 | 0.00336 | 0.00470 | NS | B  |                |
| CpaTR077-16  | 16  | 37.50 |    | 1 | 0.00323 | 0.00839 | B  | B  |                |
| CpaTR078-61  | 61  | 54.10 |    | 2 | 0.00322 | 0.00568 |    |    |                |
| CpaTR079-262 | 262 | 47.71 |    | 1 | 0.00313 | 0.00314 |    |    |                |
| CpaTR080-258 | 258 | 58.53 | 9  | 1 | 0.00310 | 0.00396 |    |    | CR1-2_LMi      |
| CpaTR081-170 | 170 | 63.53 | 6  | 2 | 0.00300 | 0.00083 | NS | NS |                |
| CpaTR082-158 | 158 | 68.35 | 7  | 1 | 0.00281 | 0.00416 |    |    |                |
| CpaTR083-84  | 84  | 59.52 | 8  | 1 | 0.00267 | 0.00384 |    |    |                |
| CpaTR084-183 | 183 | 60.66 |    | 2 | 0.00264 | 0.00410 |    |    |                |
| CpaTR085-37  | 37  | 56.76 |    | 1 | 0.00255 | 0.00492 |    |    |                |
| CpaTR086-227 | 227 | 59.91 | 10 | 2 | 0.00240 | 0.00386 |    |    |                |
| CpaTR087-247 | 247 | 61.54 | 4  | 2 | 0.00226 | 0.00225 | NS | NS |                |
| CpaTR088-170 | 170 | 62.35 | 6  | 2 | 0.00186 | 0.00302 |    |    |                |
| CpaTR089-112 | 112 | 46.88 | 11 | 1 | 0.00184 | 0.00204 |    |    |                |
| CpaTR090-206 | 206 | 71.81 |    | 1 | 0.00166 | 0.00374 |    |    |                |
| CpaTR091-49  | 49  | 57.14 |    | 1 | 0.00137 | 0.00187 | B  | B  |                |
| CpaTR092-99  | 99  | 57.58 |    | 1 | 0.00131 | 0.00046 |    |    |                |
| CpaTR093-142 | 142 | 62.68 | 12 | 1 | 0.00122 | 0.00057 |    |    |                |
| CpaTR094-170 | 170 | 63.53 | 6  | 1 | 0.00116 | 0.00144 | NS | B  |                |
| CpaTR095-56  | 56  | 60.71 |    | 1 | 0.00098 | 0.00032 |    |    |                |
| CpaTR096-70  | 70  | 58.57 |    | 1 | 0.00071 | 0.00150 |    |    |                |
| CpaTR097-108 | 108 | 69.44 |    | 2 | 0.00066 | 0.00409 | NS | B  |                |
| CpaTR098-169 | 169 | 62.72 |    | 1 | 0.00060 | 0.00366 |    |    |                |
| CpaTR099-82  | 82  | 59.76 | 12 | 1 | 0.00056 | 0.00059 |    |    |                |
| CpaTR100-295 | 295 | 51.19 | 13 | 1 | 0.00054 | 0.00175 | NS | B  |                |

|              |     |       |    |   |         |         |    |    |
|--------------|-----|-------|----|---|---------|---------|----|----|
| CpaTR101-112 | 112 | 58.04 |    | 1 | 0.00051 | 0.00077 | NS | NS |
| CpaTR102-127 | 127 | 50.39 | 11 | 1 | 0.00042 | 0.00025 | NS | NS |
| CpaTR103-33  | 33  | 45.45 |    | 1 | 0.00042 | 0.00544 | NS | B  |
| CpaTR104-269 | 269 | 62.45 |    | 1 | 0.00040 | 0.02635 | B  | B  |
| CpaTR105-6   | 6   | 66.67 |    | 1 | 0.00021 | 0.00011 |    |    |
| CpaTR106-96  | 96  | 48.96 | 11 | 1 | 0.00019 | 0.00017 |    |    |
| CpaTR107-237 | 237 | 49.79 | 13 | 1 | 0.00006 | 0.00088 | NS | B  |
| CpaTR108-37  | 37  | 51.35 |    | 2 | 0.00003 | 0.00382 | NS | NS |
| CpaTR109-108 | 108 | 54.63 |    | 1 | 0.00003 | 0.00058 | NS | NS |
| CpaTR110-159 | 159 | 51.57 | 13 | 1 | 0.00003 | 0.00028 | B  | B  |

---

**Table S3.** Molecular properties of the 50 TR families showing FISH bands in at least one of the subspecies. RUL= Repeat Unit Length, A+T= adenin+thymine content, SF= superfamily, Subfam= number of subfamilies, CPPabun and CPE abun= genomic abundance per subspecies, CPPdiv and CPEdiv= K2P divergence, CPP\_TSI and CPE\_TSI= tandem structure index in each subspecies, CPP\_RPS and CPE\_RPS= relative peak size index for homogenization, CPP\_DIVPEAK and CPE\_DIVPEAK= divergence corresponding to the highest abundance peak in the RL, as an index of TR degeneration. TE\_homology= TRs displaying homology, in their consensus sequence, with transposable elements (TEs) in RepBase.

| Satellite    | RUL | A+T (%) | SF | Subfam | Genomic abundance (%) |         | Divergence (%) |        | Tandem structure index |         | Homogenization coefficient (RPS) (%) |         | Degeneration coefficient (DIVPEAK) |             | TE_homology                  |
|--------------|-----|---------|----|--------|-----------------------|---------|----------------|--------|------------------------|---------|--------------------------------------|---------|------------------------------------|-------------|------------------------------|
|              |     |         |    |        | CPPabun               | CPEabun | CPPdiv         | CPEdiv | CPP_TSI                | CPE_TSI | CPP_RPS                              | CPE_RPS | CPP_DIVPEAK                        | CPE_DIVPEAK |                              |
| CpaTR004-335 | 335 | 61.19   |    | 2      | 0.27214               | 0.23718 | 5.54           | 5.62   | 0.96                   | 0.9630  | 58.2                                 | 57.8    | 0.5                                | 0.5         | Helitron-N19B_LMi, DNA-7_LMi |
| CpaTR006-11  | 11  | 36.36   |    | 2      | 0.21965               | 0.14931 | 4.01           | 3.89   | 1.00                   | 0.9955  | 93.3                                 | 93.5    | 4.0                                | 4.0         |                              |
| CpaTR007-21  | 21  | 38.10   |    | 1      | 0.09553               | 0.10323 | 5.80           | 5.79   | 0.95                   | 0.9546  | 80.5                                 | 80.9    | 5.0                                | 5.0         |                              |
| CpaTR008-331 | 331 | 64.05   | 2  | 1      | 0.09247               | 0.09413 | 8.71           | 8.58   | 0.88                   | 0.8753  | 45.0                                 | 46.7    | 3.0                                | 4.0         | Helitron-N11B_LMi            |
| CpaTR009-172 | 172 | 63.95   | 2  | 2      | 0.07876               | 0.08039 | 13.80          | 13.82  | 0.82                   | 0.8239  | 19.3                                 | 17.7    | 26.0                               | 4.5         | Helitron-N11B_LMi            |
| CpaTR010-275 | 275 | 52.00   |    | 2      | 0.07597               | 0.08906 | 8.87           | 8.65   | 0.99                   | 0.9881  | 34.2                                 | 36.3    | 5.0                                | 5.0         |                              |
| CpaTR011-213 | 213 | 58.69   |    | 2      | 0.06702               | 0.06434 | 3.99           | 3.92   | 0.98                   | 0.9810  | 75.9                                 | 76.6    | 2.5                                | 3.0         |                              |
| CpaTR012-247 | 247 | 53.85   |    | 1      | 0.05453               | 0.06219 | 3.02           | 2.81   | 0.88                   | 0.9047  | 88.4                                 | 90.3    | 2.0                                | 2.0         | hAT-30N1_LMi                 |
| CpaTR013-55  | 55  | 60.00   |    | 3      | 0.05330               | 0.05227 | 7.99           | 8.06   | 0.70                   | 0.7003  | 45.8                                 | 46.2    | 5.5                                | 6.5         |                              |
| CpaTR016-7   | 7   | 71.43   |    | 1      | 0.03373               | 0.00464 | 3.43           | 3.99   | 1.00                   | 0.9976  | 72.8                                 | 58.7    | 2.5                                | 5.0         |                              |
| CpaTR017-289 | 289 | 51.90   |    | 2      | 0.03343               | 0.03444 | 17.25          | 17.52  | 0.92                   | 0.9127  | 39.3                                 | 34.6    | 2.0                                | 1.5         |                              |
| CpaTR020-246 | 246 | 59.35   | 4  | 2      | 0.02242               | 0.02403 | 4.73           | 4.78   | 0.95                   | 0.9508  | 58.4                                 | 49.7    | 2.0                                | 1.5         | CR1-1_LMi                    |
| CpaTR024-210 | 210 | 61.43   | 3  | 1      | 0.01966               | 0.02190 | 3.81           | 3.40   | 1.00                   | 0.9978  | 80.1                                 | 84.1    | 2.5                                | 3.0         |                              |
| CpaTR025-248 | 248 | 62.90   | 5  | 2      | 0.01960               | 0.02061 | 4.94           | 4.38   | 0.91                   | 0.9208  | 48.8                                 | 50.2    | 0.5                                | 0.5         |                              |
| CpaTR026-239 | 239 | 59.83   | 3  | 1      | 0.01916               | 0.04248 | 4.30           | 2.90   | 1.00                   | 0.9975  | 57.5                                 | 82.3    | 0.5                                | 2.5         |                              |
| CpaTR028-148 | 148 | 59.46   | 1  | 2      | 0.01586               | 0.01787 | 9.27           | 9.29   | 0.95                   | 0.9465  | 64.1                                 | 61.8    | 4.0                                | 3.5         | Helitron-N10_LMi             |
| CpaTR030-79  | 79  | 45.57   |    | 3      | 0.01368               | 0.01075 | 5.82           | 6.27   | 0.99                   | 0.9894  | 70.4                                 | 67.6    | 5.0                                | 4.5         |                              |
| CpaTR032-20  | 20  | 65.00   |    | 2      | 0.01080               | 0.02159 | 7.15           | 7.05   | 0.93                   | 0.9541  | 56.9                                 | 71.6    | 5.0                                | 6.0         |                              |
| CpaTR033-222 | 222 | 63.06   | 5  | 2      | 0.01029               | 0.01255 | 3.43           | 3.10   | 0.92                   | 0.9305  | 79.1                                 | 85.8    | 1.5                                | 1.5         |                              |
| CpaTR034-61  | 61  | 57.38   |    | 1      | 0.00963               | 0.01749 | 13.04          | 9.77   | 0.03                   | 0.8171  | 52.5                                 | 68.8    | 15.0                               | 2.0         |                              |
| CpaTR036-168 | 168 | 58.93   |    | 3      | 0.00923               | 0.00433 | 6.83           | 6.53   | 0.95                   | 0.9506  | 62.3                                 | 54.8    | 8.0                                | 8.0         | PST1                         |
| CpaTR039-139 | 139 | 46.04   |    | 2      | 0.00817               | 0.00803 | 3.88           | 3.68   | 1.00                   | 0.9963  | 78.8                                 | 78.6    | 1.5                                | 1.5         |                              |
| CpaTR040-161 | 161 | 58.39   | 6  | 3      | 0.00798               | 0.00494 | 7.40           | 8.40   | 0.98                   | 0.9622  | 62.5                                 | 49.9    | 1.5                                | 2.0         |                              |
| CpaTR044-205 | 205 | 59.02   |    | 1      | 0.00734               | 0.00893 | 5.71           | 5.69   | 1.00                   | 0.9966  | 72.8                                 | 77.0    | 4.5                                | 5.0         |                              |
| CpaTR046-157 | 157 | 68.15   | 7  | 2      | 0.00730               | 0.01031 | 7.63           | 7.40   | 0.95                   | 0.9512  | 47.7                                 | 52.0    | 3.5                                | 3.5         |                              |
| CpaTR047-287 | 287 | 62.37   |    | 1      | 0.00655               | 0.01115 | 10.62          | 7.21   | 0.50                   | 0.7383  | 26.5                                 | 56.9    | 0.0                                | 0.0         |                              |
| CpaTR048-15  | 15  | 40.00   |    | 1      | 0.00639               | 0.00453 | 11.67          | 12.56  | 0.99                   | 0.9862  | 61.2                                 | 53.3    | 10.0                               | 10.0        |                              |
| CpaTR049-215 | 215 | 59.53   |    | 1      | 0.00625               | 0.00196 | 4.32           | 3.46   | 0.98                   | 0.9775  | 79.3                                 | 80.1    | 3.0                                | 1.0         |                              |
| CpaTR050-288 | 288 | 67.01   |    | 1      | 0.00584               | 0.00830 | 3.26           | 2.96   | 0.01                   | 0.2381  | 64.2                                 | 73.4    | 0.0                                | 0.0         | RTE-53_LMi                   |
| CpaTR053-405 | 405 | 60.74   | 9  | 1      | 0.00536               | 0.00835 | 6.83           | 4.35   | 0.87                   | 0.9150  | 43.2                                 | 66.2    | 1.5                                | 0.5         | CR1-2_LMi                    |
| CpaTR057-102 | 102 | 39.22   |    | 1      | 0.00493               | 0.00246 | 18.23          | 17.49  | 0.97                   | 0.9711  | 46.7                                 | 47.9    | 19.5                               | 20.5        |                              |
| CpaTR058-196 | 196 | 60.20   |    | 2      | 0.00481               | 0.00475 | 9.31           | 9.93   | 0.93                   | 0.9081  | 44.1                                 | 38.8    | 3.5                                | 1.5         |                              |
| CpaTR061-27  | 27  | 44.44   |    | 1      | 0.00449               | 0.00507 | 9.72           | 10.22  | 1.00                   | 0.9972  | 50.5                                 | 45.1    | 5.0                                | 6.5         |                              |
| CpaTR062-56  | 56  | 46.43   |    | 1      | 0.00443               | 0.00442 | 7.73           | 6.93   | 0.93                   | 0.9449  | 78.8                                 | 84.9    | 2.5                                | 3.0         | hAT-N34_LMi                  |
| CpaTR063-92  | 92  | 39.13   |    | 1      | 0.00441               | 0.00235 | 6.28           | 5.22   | 0.99                   | 0.9897  | 71.1                                 | 65.9    | 4.5                                | 5.0         |                              |
| CpaTR065-379 | 379 | 63.32   |    | 1      | 0.00422               | 0.00264 | 9.02           | 11.49  | 0.72                   | 0.5501  | 50.7                                 | 22.9    | 0.0                                | 0.5         | Penelope-6_LMi               |
| CpaTR068-155 | 155 | 61.29   |    | 1      | 0.00402               | 0.00225 | 3.56           | 2.10   | 1.00                   | 0.9989  | 69.0                                 | 94.5    | 3.0                                | 1.5         |                              |
| CpaTR069-89  | 89  | 63.27   |    | 1      | 0.00398               | 0.00133 | 9.48           | 9.97   | 0.97                   | 0.9285  | 64.9                                 | 54.9    | 4.5                                | 3.5         |                              |
| CpaTR074-186 | 186 | 57.53   |    | 1      | 0.00351               | 0.00795 | 7.59           | 6.28   | 0.99                   | 0.9897  | 65.4                                 | 66.0    | 6.0                                | 5.0         |                              |
| CpaTR075-45  | 45  | 48.89   |    | 1      | 0.00342               | 0.00226 | 4.36           | 4.96   | 0.99                   | 0.9960  | 76.1                                 | 62.3    | 2.5                                | 3.5         |                              |
| CpaTR076-168 | 168 | 63.10   |    | 2      | 0.00336               | 0.00470 | 6.80           | 6.56   | 0.89                   | 0.8824  | 57.4                                 | 56.8    | 3.5                                | 4.0         |                              |
| CpaTR077-16  | 16  | 37.50   |    | 1      | 0.00323               | 0.00839 | 8.55           | 8.66   | 0.99                   | 0.9907  | 66.6                                 | 61.0    | 7.5                                | 8.5         |                              |
| CpaTR091-49  | 49  | 57.14   |    | 1      | 0.00137               | 0.00187 | 3.59           | 2.49   | 0.97                   | 0.9894  | 92.9                                 | 95.5    | 2.0                                | 1.5         |                              |
| CpaTR094-170 | 170 | 63.53   | 6  | 1      | 0.00116               | 0.00144 | 14.64          | 15.27  | 0.87                   | 0.8857  | 41.0                                 | 40.8    | 14.5                               | 16.5        |                              |
| CpaTR097-108 | 108 | 69.44   |    | 2      | 0.00066               | 0.00409 | 16.77          | 6.99   | 0.56                   | 0.9278  | 45.5                                 | 76.9    | 22.5                               | 3.0         |                              |
| CpaTR100-295 | 295 | 51.19   | 13 | 1      | 0.00054               | 0.00175 | 3.44           | 2.32   | 0.92                   | 0.9795  | 72.1                                 | 89.8    | 1.5                                | 1.0         |                              |

|              |     |       |    |   |         |         |       |       |      |        |      |      |      |     |
|--------------|-----|-------|----|---|---------|---------|-------|-------|------|--------|------|------|------|-----|
| CpaTR103-33  | 33  | 45.45 |    | 1 | 0.00042 | 0.00544 | 18.27 | 5.34  | 0.11 | 0.9918 | 46.5 | 86.6 | 16.5 | 3.5 |
| CpaTR104-269 | 269 | 62.45 |    | 1 | 0.00040 | 0.02635 | 23.43 | 3.54  | 0.82 | 0.9967 | 32.4 | 84.7 | 22.0 | 2.0 |
| CpaTR107-237 | 237 | 49.79 | 13 | 1 | 0.00006 | 0.00088 | 6.62  | 2.10  | 0.88 | 0.9855 | 52.0 | 94.5 | 11.0 | 1.0 |
| CpaTR110-159 | 159 | 51.57 | 13 | 1 | 0.00003 | 0.00028 | 3.13  | 12.28 | 0.85 | 0.9395 | 55.5 | 93.5 | 6.0  | 0.0 |
